# Supplementary material for: Insulin enhancement of the antitumor activity of chemotherapeutic agents in colorectal cancer is linked with downregulating PIK3CA and GRB2
Source: PubMed Central journal article supplement (PMC6851401; doi:10.1038/s41598-019-53145-x), 2019-11-12
Supplement: 41598_2019_53145_MOESM1_ESM.pdf [file 41598_2019_53145_MOESM1_ESM.pdf]

## Supplementary information file

Insulin enhancement of the antitumor activity of chemotherapeutic agents in colorectal cancer is linked with downregulating PIK3CA and GRB2

Siddarth Agrawal<sup>1</sup>, Marta Woźniak<sup>1</sup>, Mateusz Luc<sup>1</sup>, Sebastian Makuch<sup>1</sup>, Ewa Pielka<sup>1</sup>, Anil Kumar Agrawal<sup>2</sup>, Joanna Wietrzyk<sup>3</sup>, Joanna Banach<sup>3</sup>, Andrzej Gamian<sup>4</sup>, Monika Pizon<sup>5</sup>, Piotr Ziółkowski<sup>1</sup>

1. *Department of Pathology, Wroclaw Medical University, Wroclaw, Poland*
2. *2nd Department and Clinic of General and Oncological Surgery, Wroclaw Medical University*
3. *Department of Experimental Oncology, Ludwik Hirszfeld Institute of Immunology and Experimental Therapy, Polish Academy of Sciences*
4. *Department of Biochemistry, Wroclaw Medical University*
5. *Transfusion Center Bayreuth, Kurpromenade 2, 95448 Bayreuth, Germany*

Corresponding author

Siddarth Agrawal

Department of Pathology, Wroclaw Medical University

Marcinkowskiego St.1, 50-368 Wroclaw, Poland

Tel.: +48 71 784 12 12, Fax: +48 71 784 00 57

[siddarth@agrawal.pl](mailto:siddarth@agrawal.pl)

All authors declare that they have no competing interests.

Research was funded by the Wroclaw Medical University grant no.: ST.A010.17.006 and grant no.: STM.A011.17.055 and Polish National Science Center (NCN) grant no. 2015/19/N/NZ5/00001

Keywords: insulin; chemotherapy; colorectal cancer; fluorouracil

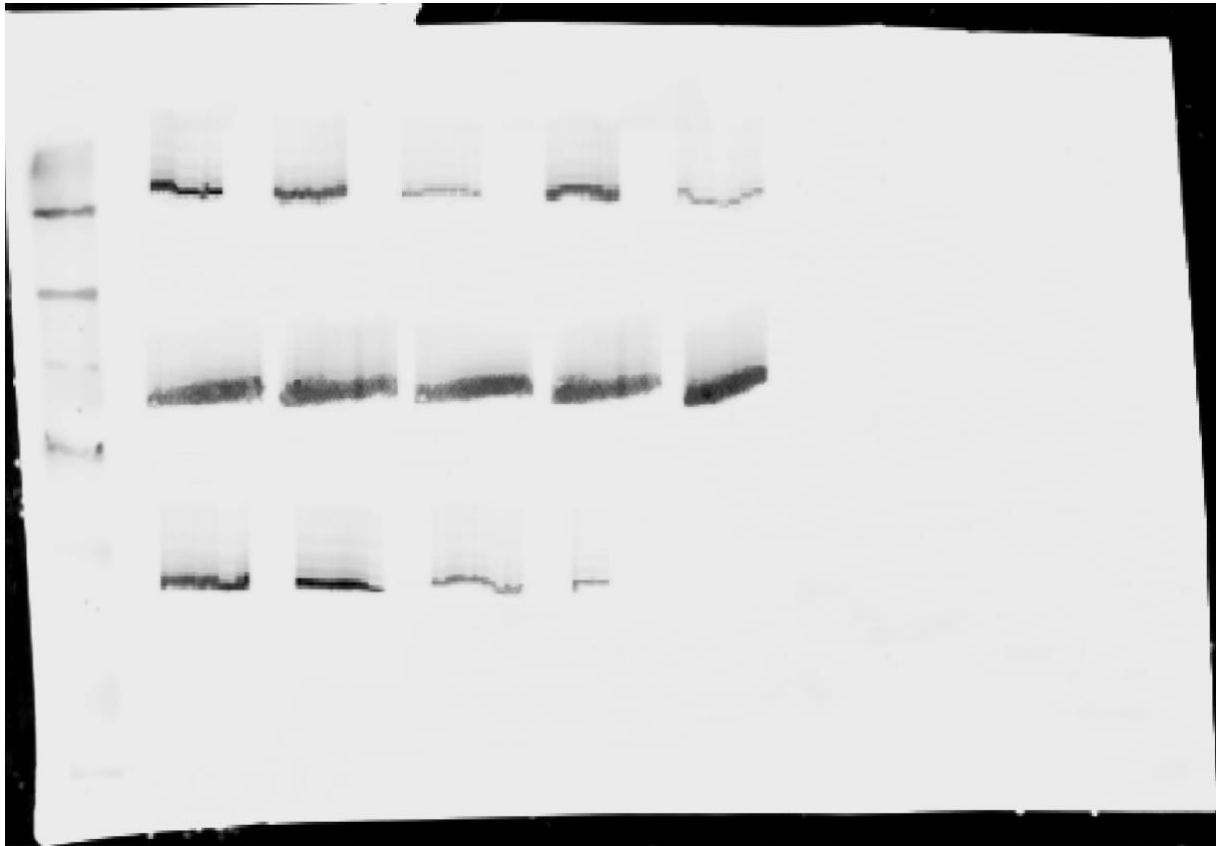

**Supplementary Figure S1. Unprocessed original scans for the blots presented in Figure 3 – Caco-2 cell line.** The bands are (starting from the top): PI3K p85 (85kDa); Beta actin (44kDa); GRB2 (25 kDa). Bands represent (starting from the left): control, irinotecan, irinotecan + insulin; fluorouracil; fluorouracil + insulin.

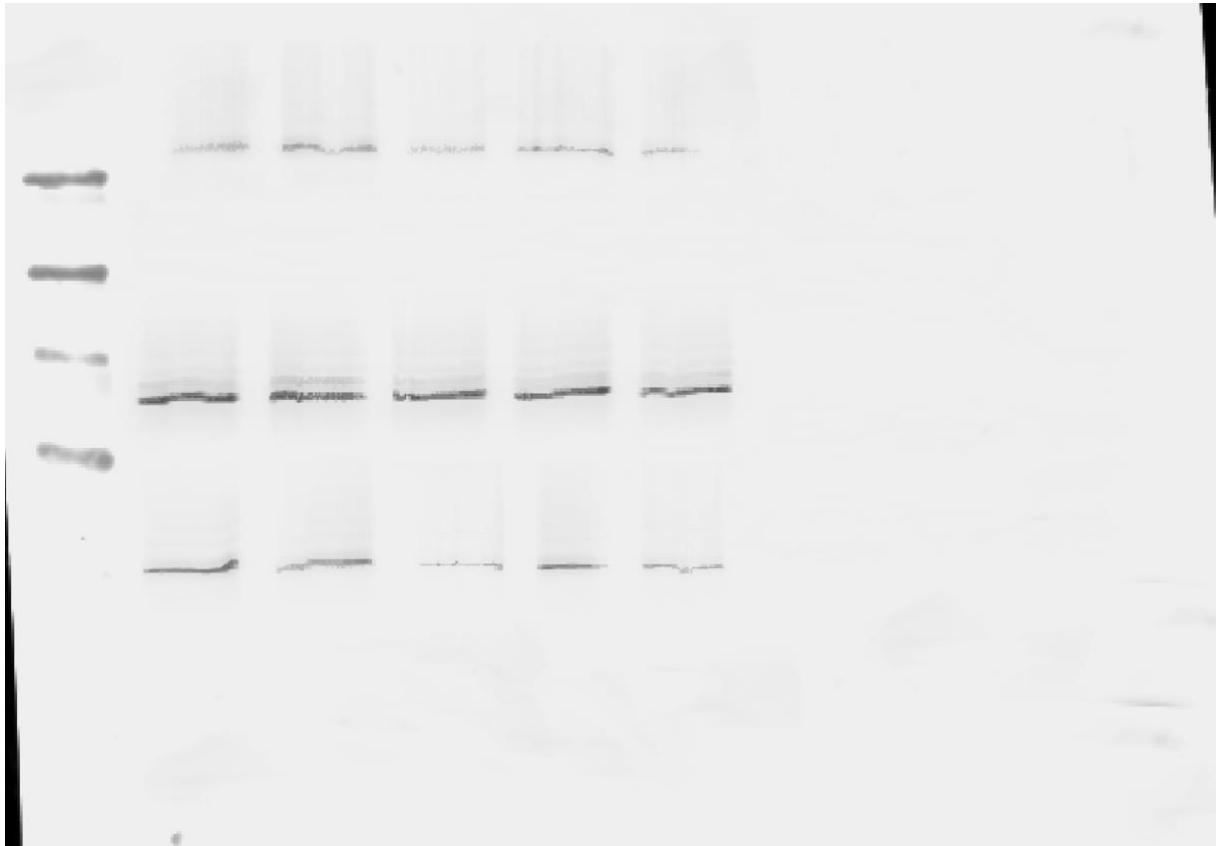

**Supplementary Figure S2. Unprocessed original scans for the blots presented in Figure 3 – SW480 cell line.** The bands are (starting from the top): PI3K p85 (85kDa); Beta actin (44kDa); GRB2 (25 kDa). Bands represent (starting from the left): control, irinotecan, irinotecan + insulin; fluorouracil; fluorouracil + insulin.
